# Supplementary material
Source: MDPI journal article supplement (https://www.mdpi.com/2079-6412/12/1/76)
Supplement: s1 [file s1]

# Supplementary Materials: Investigation of Accelerated Degradation Methods to Cause Blisters for Non-Defective Vinyl Ester Resin Glass Flake Organic Coatings

Koya Tokutake <sup>1,\*</sup>, Shinji Okazaki <sup>2</sup> and Shintaro Kodama <sup>3</sup>

<sup>1</sup> National Research Institute of Fire and Disaster, 4-35-3, Jindaiji-Higashimachi, Chofu, Tokyo 182-8508, Japan

<sup>2</sup> Graduate School of Engineering, Yokohama National University, 79-5, Tokiwadai, Hodogaya-ku, Yokohama 240-8501, Japan; okazaki-shinji-yp@ynu.ac.jp

<sup>3</sup> Japan Oil, Gas and Metals National Corporation, 10-1, Toranomon, 2-Chome Minato-ku, Tokyo 105-0001, Japan; kodama-shintaro@jogmec.go.jp

\* Correspondence: tokutake@fri.go.jp

**Citation:** Tokutake, K.; Okazaki, S.; Kodama, S. Investigation of Accelerated Degradation Methods to Cause Blisters for Non-Defective Vinyl Ester Resin Glass Flake Organic Coatings. *Coatings* **2022**, *11*, 76. <https://doi.org/10.3390/coatings12010076>

Academic Editors: Csaba Balázs and Claudio Mele

Received: 22 November 2021

Accepted: 28 December 2021

Published: 10 January 2022

**Publisher's Note:** MDPI stays neutral with regard to jurisdictional claims in published maps and institutional affiliations.

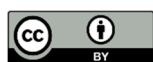

**Copyright:** © 2022 by the authors. Licensee MDPI, Basel, Switzerland. This article is an open access article distributed under the terms and conditions of the Creative Commons Attribution (CC BY) license (<https://creativecommons.org/licenses/by/4.0/>).

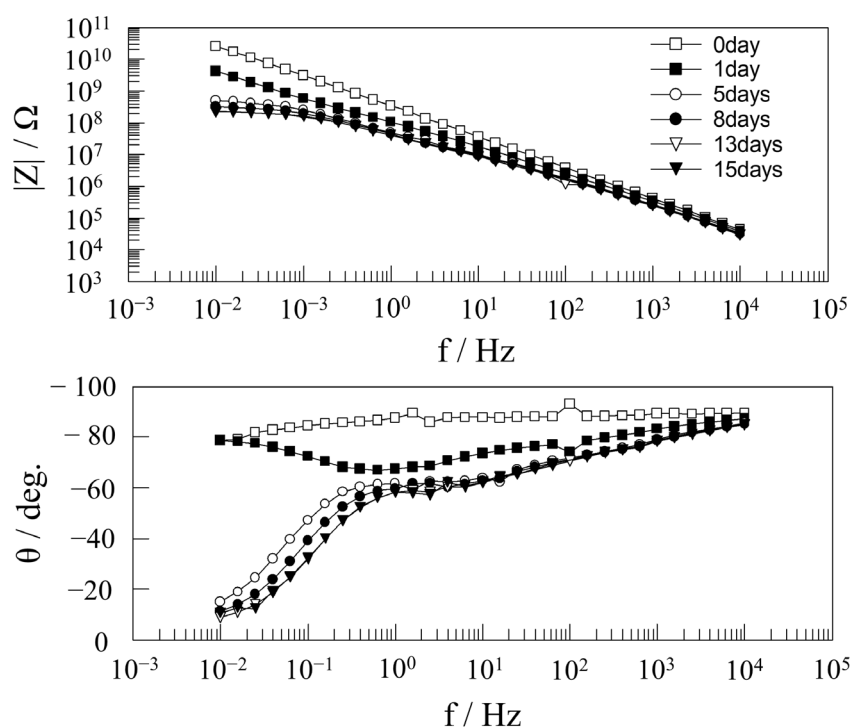

**Figure S1.** All impedance characteristics (Bode plot) of the C3 specimen during immersion in a 3wt.% NaCl solution at 60°C.

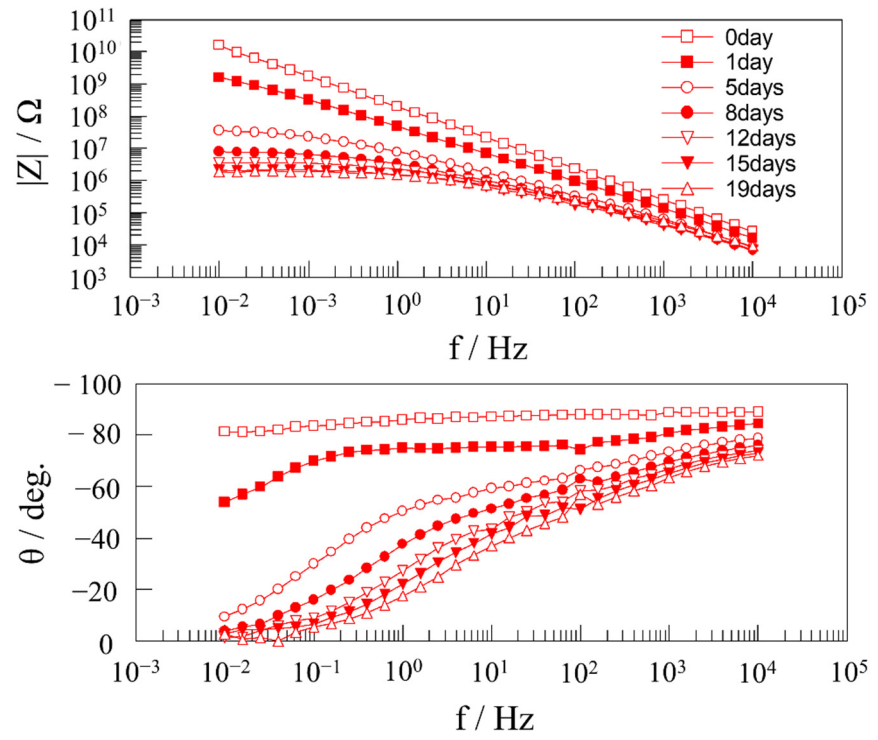

**Figure S2.** All impedance characteristics (Bode plot) of the C4 specimen during immersion in a 50 wt.% AcOH aqueous solution.

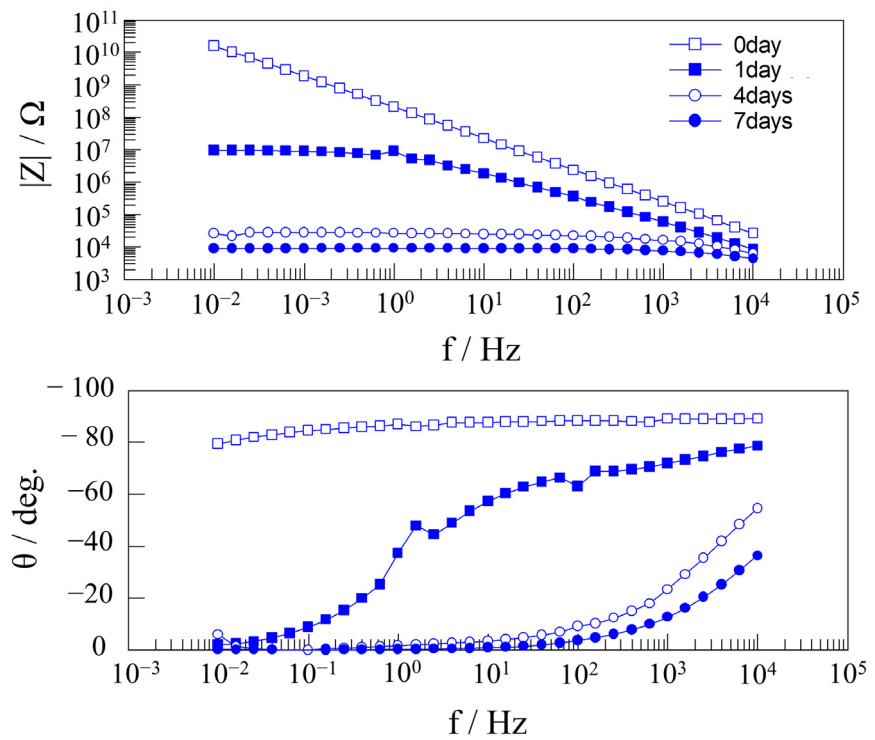

**Figure S3.** All impedance characteristics (Bode plot) of the C5 specimen during immersion in a 75 wt.% AcOH aqueous solution.

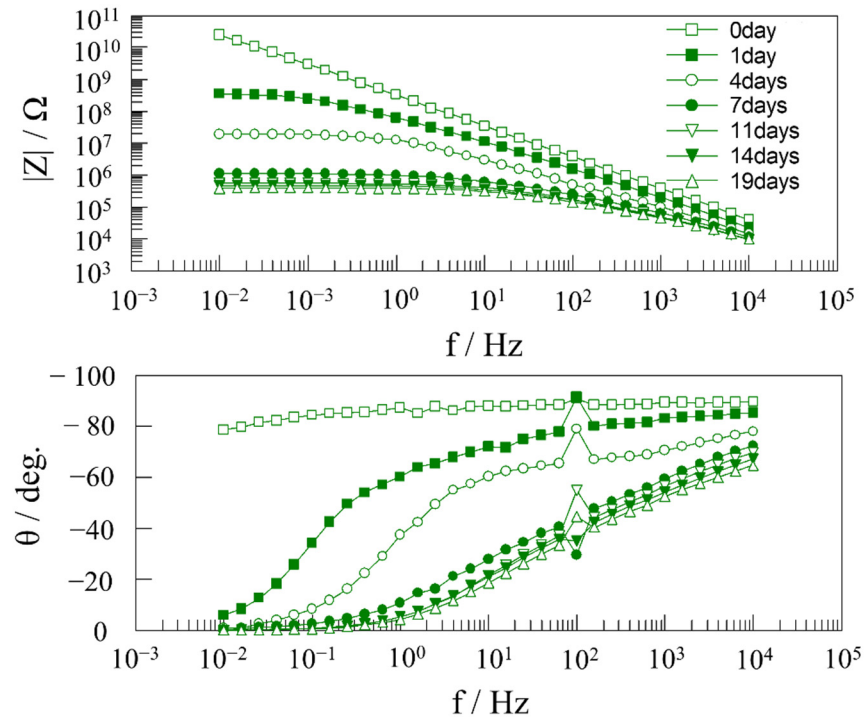

**Figure S4.** All impedance characteristics (Bode plot) of the C6 specimen during immersion in a 75 wt.% AcOH aqueous solution.

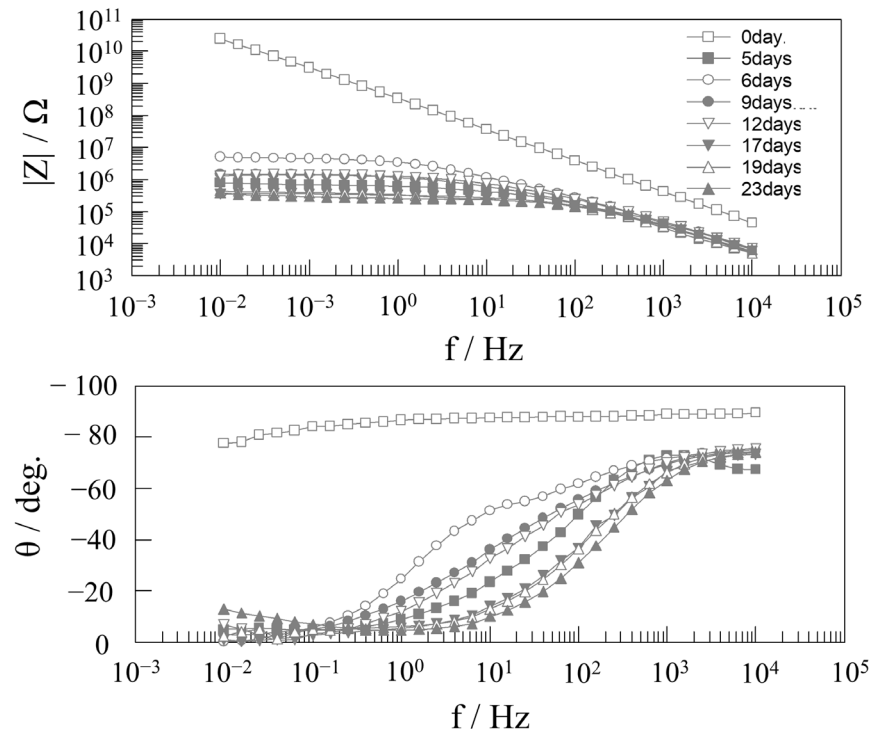

**Figure S5.** All impedance characteristics (Bode plot) of the C7 specimen exposed to the combined degradation accelerated test, which consists of serial immersions in HF and AcOH aqueous solutions.

### 1. Fitting parameters

By giving the resistance and capacitance values shown in the tables to the Voigt measurement model, the fitting curves corresponding to the impedance characteristic of each measurement day can be obtained.

**Table S1.** Resistance and capacitance values for each R/C element and their standard deviations obtained by equivalent circuit analysis using the Voigt measurement model for the impedance characteristics of each measurement date in C3 specimen.

| 0 day          |                       |                        |                        |                        |
|----------------|-----------------------|------------------------|------------------------|------------------------|
| Element Number | R / $\Omega$          | R Std. Dev. / $\Omega$ | C /F                   | C Std. Dev. /F         |
| 1              | $7.07 \times 10^4$    | $1.47 \times 10^4$     | $3.95 \times 10^{-9}$  | $1.10 \times 10^{-9}$  |
| 2              | $3.35 \times 10^6$    | $8.44 \times 10^5$     | $4.81 \times 10^{-9}$  | $1.62 \times 10^{-9}$  |
| 3              | $1.39 \times 10^8$    | $3.52 \times 10^7$     | $3.82 \times 10^{-9}$  | $1.24 \times 10^{-9}$  |
| 4              | $3.43 \times 10^9$    | $1.07 \times 10^9$     | $2.32 \times 10^{-9}$  | $8.73 \times 10^{-10}$ |
| 5              | $2.79 \times 10^{11}$ | $8.82 \times 10^{10}$  | $6.64 \times 10^{-10}$ | $3.14 \times 10^{-10}$ |
| 1 day(27 h)    |                       |                        |                        |                        |
| Element Number | R / $\Omega$          | R Std. Dev. / $\Omega$ | C /F                   | C Std. Dev. /F         |
| 1              | $3.18 \times 10^4$    | $4.14 \times 10^3$     | $2.80 \times 10^{-9}$  | $4.62 \times 10^{-10}$ |
| 2              | $2.93 \times 10^5$    | $2.03 \times 10^4$     | $2.16 \times 10^{-9}$  | $1.50 \times 10^{-10}$ |
| 3              | $2.01 \times 10^6$    | $2.26 \times 10^5$     | $2.37 \times 10^{-9}$  | $3.45 \times 10^{-10}$ |
| 4              | $1.48 \times 10^7$    | $1.97 \times 10^6$     | $2.47 \times 10^{-9}$  | $4.22 \times 10^{-10}$ |
| 5              | $5.26 \times 10^7$    | $8.01 \times 10^6$     | $3.75 \times 10^{-9}$  | $8.02 \times 10^{-10}$ |
| 6              | $1.17 \times 10^8$    | $1.43 \times 10^7$     | $8.20 \times 10^{-9}$  | $1.87 \times 10^{-9}$  |
| 7              | $4.47 \times 10^8$    | $1.01 \times 10^8$     | $1.62 \times 10^{-8}$  | $5.10 \times 10^{-9}$  |
| 8              | $6.27 \times 10^{10}$ | $1.69 \times 10^{10}$  | $3.94 \times 10^{-9}$  | $1.57 \times 10^{-9}$  |
| 5 days(125 h)  |                       |                        |                        |                        |
| Element Number | R / $\Omega$          | R Std. Dev. / $\Omega$ | C /F                   | C Std. Dev. /F         |
| 1              | $1.66 \times 10^4$    | $7.80 \times 10^3$     | $2.88 \times 10^{-9}$  | $1.65 \times 10^{-9}$  |
| 2              | $1.92 \times 10^5$    | $4.36 \times 10^4$     | $1.83 \times 10^{-9}$  | $5.90 \times 10^{-10}$ |
| 3              | $1.38 \times 10^6$    | $4.07 \times 10^5$     | $2.22 \times 10^{-9}$  | $8.51 \times 10^{-10}$ |
| 4              | $5.38 \times 10^6$    | $7.21 \times 10^5$     | $3.02 \times 10^{-9}$  | $7.56 \times 10^{-10}$ |
| 5              | $2.44 \times 10^7$    | $2.16 \times 10^6$     | $5.19 \times 10^{-9}$  | $8.16 \times 10^{-10}$ |
| 6              | $2.48 \times 10^8$    | $2.82 \times 10^7$     | $6.25 \times 10^{-9}$  | $8.99 \times 10^{-10}$ |
| 7              | $2.47 \times 10^8$    | $2.61 \times 10^7$     | $2.69 \times 10^{-8}$  | $4.84 \times 10^{-9}$  |
| 8 days(199 h)  |                       |                        |                        |                        |
| Element Number | R / $\Omega$          | R Std. Dev. / $\Omega$ | C /F                   | C Std. Dev. /F         |
| 1              | $8.56 \times 10^3$    | $3.42 \times 10^3$     | $3.68 \times 10^{-9}$  | $1.79 \times 10^{-9}$  |
| 2              | $9.66 \times 10^4$    | $2.39 \times 10^4$     | $2.14 \times 10^{-9}$  | $6.89 \times 10^{-10}$ |
| 3              | $4.51 \times 10^5$    | $1.16 \times 10^5$     | $2.59 \times 10^{-9}$  | $9.22 \times 10^{-10}$ |
| 4              | $2.19 \times 10^6$    | $3.62 \times 10^5$     | $2.86 \times 10^{-9}$  | $7.17 \times 10^{-10}$ |
| 5              | $8.18 \times 10^6$    | $4.56 \times 10^5$     | $3.74 \times 10^{-9}$  | $4.53 \times 10^{-10}$ |
| 6              | $3.82 \times 10^7$    | $3.95 \times 10^6$     | $7.83 \times 10^{-9}$  | $1.08 \times 10^{-9}$  |
| 7              | $2.12 \times 10^8$    | $6.27 \times 10^6$     | $7.71 \times 10^{-9}$  | $4.47 \times 10^{-10}$ |
| 8              | $8.08 \times 10^7$    | $6.75 \times 10^6$     | $1.25 \times 10^{-7}$  | $2.26 \times 10^{-8}$  |
| 13 days(313 h) |                       |                        |                        |                        |
| Element Number | R / $\Omega$          | R Std. Dev. / $\Omega$ | C /F                   | C Std. Dev. /F         |
| 1              | $9.80 \times 10^3$    | $1.90 \times 10^3$     | $3.41 \times 10^{-9}$  | $8.18 \times 10^{-10}$ |
| 2              | $1.19 \times 10^5$    | $1.12 \times 10^4$     | $2.01 \times 10^{-9}$  | $2.62 \times 10^{-10}$ |
| 3              | $7.34 \times 10^5$    | $8.94 \times 10^4$     | $2.40 \times 10^{-9}$  | $3.82 \times 10^{-10}$ |
| 4              | $2.98 \times 10^6$    | $2.73 \times 10^5$     | $3.18 \times 10^{-9}$  | $4.43 \times 10^{-10}$ |

| 5              | $9.99 \times 10^6$ | $5.67 \times 10^5$     | $5.02 \times 10^{-9}$ | $5.12 \times 10^{-10}$ |
|----------------|--------------------|------------------------|-----------------------|------------------------|
| 6              | $4.13 \times 10^7$ | $4.96 \times 10^6$     | $8.84 \times 10^{-9}$ | $1.35 \times 10^{-9}$  |
| 7              | $1.38 \times 10^8$ | $4.09 \times 10^6$     | $9.98 \times 10^{-9}$ | $5.93 \times 10^{-10}$ |
| 8              | $4.57 \times 10^7$ | $2.99 \times 10^6$     | $2.15 \times 10^{-7}$ | $3.08 \times 10^{-8}$  |
| 15 days(365 h) |                    |                        |                       |                        |
| Element Number | R / $\Omega$       | R Std. Dev. / $\Omega$ | C /F                  | C Std. Dev. /F         |
| 1              | $1.03 \times 10^4$ | $4.64 \times 10^3$     | $3.37 \times 10^{-9}$ | $1.87 \times 10^{-9}$  |
| 2              | $1.27 \times 10^5$ | $2.96 \times 10^4$     | $1.99 \times 10^{-9}$ | $6.30 \times 10^{-10}$ |
| 3              | $7.02 \times 10^5$ | $1.97 \times 10^5$     | $2.57 \times 10^{-9}$ | $9.73 \times 10^{-10}$ |
| 4              | $3.33 \times 10^6$ | $4.67 \times 10^5$     | $3.01 \times 10^{-9}$ | $7.11 \times 10^{-10}$ |
| 5              | $1.30 \times 10^7$ | $1.03 \times 10^6$     | $4.94 \times 10^{-9}$ | $7.37 \times 10^{-10}$ |
| 6              | $9.86 \times 10^7$ | $1.04 \times 10^7$     | $6.60 \times 10^{-9}$ | $9.00 \times 10^{-10}$ |
| 7              | $1.06 \times 10^8$ | $1.02 \times 10^7$     | $2.50 \times 10^{-8}$ | $3.69 \times 10^{-9}$  |

**Table S2.** Resistance and capacitance values for each R/C element and their standard deviations obtained by equivalent circuit analysis using the Voigt measurement model for the impedance characteristics of each measurement date in C4 specimen.

| 0 day          |                       |                        |                       |                        |
|----------------|-----------------------|------------------------|-----------------------|------------------------|
| Element Number | R / $\Omega$          | R Std. Dev. / $\Omega$ | C /F                  | C Std. Dev. /F         |
| 1              | $3.36 \times 10^4$    | $6.49 \times 10^3$     | $7.00 \times 10^{-9}$ | $1.79 \times 10^{-9}$  |
| 2              | $1.11 \times 10^6$    | $2.77 \times 10^5$     | $8.02 \times 10^{-9}$ | $2.61 \times 10^{-9}$  |
| 3              | $2.61 \times 10^7$    | $5.20 \times 10^6$     | $6.28 \times 10^{-9}$ | $1.66 \times 10^{-9}$  |
| 4              | $4.70 \times 10^8$    | $5.49 \times 10^7$     | $4.84 \times 10^{-9}$ | $8.05 \times 10^{-10}$ |
| 5              | $1.10 \times 10^{11}$ | $9.00 \times 10^9$     | $1.03 \times 10^{-9}$ | $1.22 \times 10^{-10}$ |
| 1 day(20 h)    |                       |                        |                       |                        |
| Element Number | R / $\Omega$          | R Std. Dev. / $\Omega$ | C /F                  | C Std. Dev. /F         |
| 1              | $4.04 \times 10^3$    | $4.86 \times 10^2$     | $6.08 \times 10^{-9}$ | $9.59 \times 10^{-10}$ |
| 2              | $4.41 \times 10^4$    | $6.13 \times 10^3$     | $5.00 \times 10^{-9}$ | $8.59 \times 10^{-10}$ |
| 3              | $2.04 \times 10^5$    | $3.35 \times 10^4$     | $6.09 \times 10^{-9}$ | $1.34 \times 10^{-9}$  |
| 4              | $9.04 \times 10^5$    | $1.08 \times 10^5$     | $7.30 \times 10^{-9}$ | $1.32 \times 10^{-9}$  |
| 5              | $3.82 \times 10^6$    | $4.45 \times 10^5$     | $9.91 \times 10^{-9}$ | $1.69 \times 10^{-9}$  |
| 6              | $1.79 \times 10^7$    | $2.05 \times 10^6$     | $1.25 \times 10^{-8}$ | $2.02 \times 10^{-9}$  |
| 7              | $8.77 \times 10^7$    | $1.21 \times 10^7$     | $1.52 \times 10^{-8}$ | $2.79 \times 10^{-9}$  |
| 8              | $5.84 \times 10^8$    | $3.22 \times 10^7$     | $1.10 \times 10^{-8}$ | $9.70 \times 10^{-10}$ |
| 9              | $3.91 \times 10^9$    | $1.55 \times 10^8$     | $1.32 \times 10^{-8}$ | $1.07 \times 10^{-9}$  |
| 5 days(116 h)  |                       |                        |                       |                        |
| Element Number | R / $\Omega$          | R Std. Dev. / $\Omega$ | C /F                  | C Std. Dev. /F         |
| 1              | $1.62 \times 10^3$    | $2.88 \times 10^2$     | $6.12 \times 10^{-9}$ | $1.63 \times 10^{-9}$  |
| 2              | $7.72 \times 10^3$    | $1.31 \times 10^3$     | $8.62 \times 10^{-9}$ | $2.01 \times 10^{-9}$  |
| 3              | $4.27 \times 10^4$    | $5.52 \times 10^3$     | $8.01 \times 10^{-9}$ | $1.44 \times 10^{-9}$  |
| 4              | $1.86 \times 10^5$    | $3.31 \times 10^4$     | $9.46 \times 10^{-9}$ | $2.16 \times 10^{-9}$  |
| 5              | $3.50 \times 10^5$    | $8.40 \times 10^4$     | $2.01 \times 10^{-8}$ | $7.15 \times 10^{-9}$  |
| 6              | $1.17 \times 10^6$    | $9.96 \times 10^4$     | $2.24 \times 10^{-8}$ | $3.97 \times 10^{-9}$  |
| 7              | $3.94 \times 10^6$    | $3.07 \times 10^5$     | $3.28 \times 10^{-8}$ | $4.10 \times 10^{-9}$  |
| 8              | $1.08 \times 10^7$    | $7.31 \times 10^5$     | $5.45 \times 10^{-8}$ | $5.98 \times 10^{-9}$  |
| 9              | $1.45 \times 10^7$    | $6.94 \times 10^5$     | $1.62 \times 10^{-7}$ | $1.73 \times 10^{-8}$  |
| 10             | $6.70 \times 10^6$    | $7.24 \times 10^5$     | $1.70 \times 10^{-6}$ | $3.23 \times 10^{-7}$  |
| 8 days(189 h)  |                       |                        |                       |                        |
| Element Number | R / $\Omega$          | R Std. Dev. / $\Omega$ | C /F                  | C Std. Dev. /F         |

| 1              | $1.70 \times 10^3$ | $2.20 \times 10^2$     | $6.13 \times 10^{-9}$ | $1.15 \times 10^{-9}$  |
|----------------|--------------------|------------------------|-----------------------|------------------------|
| 2              | $6.99 \times 10^3$ | $1.15 \times 10^3$     | $9.59 \times 10^{-9}$ | $2.08 \times 10^{-9}$  |
| 3              | $3.07 \times 10^4$ | $3.82 \times 10^3$     | $9.87 \times 10^{-9}$ | $1.76 \times 10^{-9}$  |
| 4              | $1.03 \times 10^5$ | $9.13 \times 10^3$     | $1.29 \times 10^{-8}$ | $1.86 \times 10^{-9}$  |
| 5              | $3.18 \times 10^5$ | $2.31 \times 10^4$     | $2.00 \times 10^{-8}$ | $2.36 \times 10^{-9}$  |
| 6              | $7.76 \times 10^5$ | $7.18 \times 10^4$     | $3.86 \times 10^{-8}$ | $5.37 \times 10^{-9}$  |
| 7              | $1.93 \times 10^6$ | $1.91 \times 10^5$     | $6.62 \times 10^{-8}$ | $9.94 \times 10^{-9}$  |
| 8              | $2.47 \times 10^6$ | $2.26 \times 10^5$     | $1.91 \times 10^{-7}$ | $3.56 \times 10^{-8}$  |
| 9              | $1.53 \times 10^6$ | $2.35 \times 10^5$     | $1.16 \times 10^{-6}$ | $3.97 \times 10^{-7}$  |
| 10             | $7.28 \times 10^5$ | $3.10 \times 10^5$     | $9.20 \times 10^{-6}$ | $4.99 \times 10^{-6}$  |
| 12 days(356 h) |                    |                        |                       |                        |
| Element Number | R / $\Omega$       | R Std. Dev. / $\Omega$ | C /F                  | C Std. Dev. /F         |
| 1              | $2.70 \times 10^3$ | $4.62 \times 10^2$     | $4.85 \times 10^{-9}$ | $1.24 \times 10^{-9}$  |
| 2              | $1.46 \times 10^4$ | $2.71 \times 10^3$     | $7.24 \times 10^{-9}$ | $1.84 \times 10^{-9}$  |
| 3              | $6.82 \times 10^4$ | $9.54 \times 10^3$     | $9.01 \times 10^{-9}$ | $1.90 \times 10^{-9}$  |
| 4              | $2.32 \times 10^5$ | $2.10 \times 10^4$     | $1.54 \times 10^{-8}$ | $2.50 \times 10^{-9}$  |
| 5              | $7.49 \times 10^5$ | $6.43 \times 10^4$     | $3.11 \times 10^{-8}$ | $4.37 \times 10^{-9}$  |
| 6              | $1.54 \times 10^6$ | $8.10 \times 10^4$     | $8.35 \times 10^{-8}$ | $9.58 \times 10^{-9}$  |
| 7              | $9.67 \times 10^5$ | $9.68 \times 10^4$     | $8.02 \times 10^{-7}$ | $1.30 \times 10^{-7}$  |
| 15 days(356 h) |                    |                        |                       |                        |
| Element Number | R / $\Omega$       | R Std. Dev. / $\Omega$ | C /F                  | C Std. Dev. /F         |
| 1              | $2.88 \times 10^3$ | $3.68 \times 10^2$     | $4.78 \times 10^{-9}$ | $9.18 \times 10^{-10}$ |
| 2              | $1.65 \times 10^4$ | $2.30 \times 10^3$     | $7.18 \times 10^{-9}$ | $1.36 \times 10^{-9}$  |
| 3              | $7.44 \times 10^4$ | $7.98 \times 10^3$     | $9.56 \times 10^{-9}$ | $1.56 \times 10^{-9}$  |
| 4              | $2.24 \times 10^5$ | $2.08 \times 10^4$     | $1.93 \times 10^{-8}$ | $3.01 \times 10^{-9}$  |
| 5              | $5.81 \times 10^5$ | $7.01 \times 10^4$     | $4.46 \times 10^{-8}$ | $8.23 \times 10^{-9}$  |
| 6              | $7.96 \times 10^5$ | $6.72 \times 10^4$     | $1.46 \times 10^{-7}$ | $2.75 \times 10^{-8}$  |
| 7              | $4.20 \times 10^5$ | $7.59 \times 10^4$     | $1.48 \times 10^{-6}$ | $4.00 \times 10^{-7}$  |
| 19 days(452 h) |                    |                        |                       |                        |
| Element Number | R / $\Omega$       | R Std. Dev. / $\Omega$ | C /F                  | C Std. Dev. /F         |
| 1              | $2.33 \times 10^3$ | $6.86 \times 10^2$     | $3.33 \times 10^{-9}$ | $1.57 \times 10^{-9}$  |
| 2              | $8.63 \times 10^3$ | $2.11 \times 10^3$     | $5.85 \times 10^{-9}$ | $2.12 \times 10^{-9}$  |
| 3              | $3.89 \times 10^4$ | $6.20 \times 10^3$     | $6.27 \times 10^{-9}$ | $1.53 \times 10^{-9}$  |
| 4              | $1.21 \times 10^5$ | $1.58 \times 10^4$     | $9.70 \times 10^{-9}$ | $2.07 \times 10^{-9}$  |
| 5              | $2.89 \times 10^5$ | $3.14 \times 10^4$     | $1.99 \times 10^{-8}$ | $3.84 \times 10^{-9}$  |
| 6              | $6.04 \times 10^5$ | $5.80 \times 10^4$     | $4.59 \times 10^{-8}$ | $8.15 \times 10^{-9}$  |
| 7              | $5.75 \times 10^5$ | $5.98 \times 10^4$     | $2.08 \times 10^{-7}$ | $4.33 \times 10^{-8}$  |
| 8              | $2.65 \times 10^5$ | $4.79 \times 10^4$     | $2.64 \times 10^{-6}$ | $7.17 \times 10^{-7}$  |

**Table S3.** Resistance and capacitance values for each R/C element and their standard deviations obtained by equivalent circuit analysis using the Voigt measurement model for the impedance characteristics of each measurement date in C5 specimen.

| 0 day          |                    |                        |                       |                        |
|----------------|--------------------|------------------------|-----------------------|------------------------|
| Element Number | R / $\Omega$       | R Std. Dev. / $\Omega$ | C /F                  | C Std. Dev. /F         |
| 1              | $2.56 \times 10^4$ | $3.71 \times 10^3$     | $8.35 \times 10^{-9}$ | $1.56 \times 10^{-9}$  |
| 2              | $4.33 \times 10^5$ | $1.04 \times 10^5$     | $1.20 \times 10^{-8}$ | $3.77 \times 10^{-9}$  |
| 3              | $9.27 \times 10^6$ | $1.68 \times 10^6$     | $8.44 \times 10^{-9}$ | $2.01 \times 10^{-9}$  |
| 4              | $1.33 \times 10^8$ | $2.48 \times 10^7$     | $7.14 \times 10^{-9}$ | $1.71 \times 10^{-9}$  |
| 5              | $2.06 \times 10^9$ | $3.88 \times 10^8$     | $4.30 \times 10^{-9}$ | $9.97 \times 10^{-10}$ |

| 6              | $2.08 \times 10^{11}$ | $4.03 \times 10^{10}$  | $1.09 \times 10^{-9}$ | $3.15 \times 10^{-10}$ |
|----------------|-----------------------|------------------------|-----------------------|------------------------|
| 1 day(22 h)    |                       |                        |                       |                        |
| Element Number | R / $\Omega$          | R Std. Dev. / $\Omega$ | C /F                  | C Std. Dev. /F         |
| 1              | $3.98 \times 10^3$    | $7.83 \times 10^2$     | $5.65 \times 10^{-9}$ | $1.51 \times 10^{-9}$  |
| 2              | $3.17 \times 10^4$    | $4.82 \times 10^3$     | $6.11 \times 10^{-9}$ | $1.31 \times 10^{-9}$  |
| 3              | $1.53 \times 10^5$    | $2.65 \times 10^4$     | $9.95 \times 10^{-9}$ | $2.49 \times 10^{-9}$  |
| 4              | $8.62 \times 10^5$    | $9.24 \times 10^4$     | $1.27 \times 10^{-8}$ | $2.13 \times 10^{-9}$  |
| 5              | $5.30 \times 10^6$    | $2.07 \times 10^5$     | $1.48 \times 10^{-8}$ | $1.11 \times 10^{-9}$  |
| 6              | $3.19 \times 10^6$    | $2.30 \times 10^5$     | $1.99 \times 10^{-7}$ | $2.53 \times 10^{-8}$  |
| 4 days(90 h)   |                       |                        |                       |                        |
| Element Number | R / $\Omega$          | R Std. Dev. / $\Omega$ | C /F                  | C Std. Dev. /F         |
| 1              | $2.49 \times 10^3$    | $1.07 \times 10^3$     | $3.15 \times 10^{-9}$ | $1.68 \times 10^{-9}$  |
| 2              | $5.82 \times 10^3$    | $1.29 \times 10^3$     | $5.07 \times 10^{-9}$ | $1.99 \times 10^{-9}$  |
| 3              | $8.37 \times 10^3$    | $1.69 \times 10^3$     | $1.03 \times 10^{-8}$ | $2.80 \times 10^{-9}$  |
| 4              | $4.89 \times 10^3$    | $4.65 \times 10^2$     | $1.00 \times 10^{-7}$ | $2.11 \times 10^{-8}$  |
| 5              | $2.68 \times 10^3$    | $4.85 \times 10^2$     | $9.34 \times 10^{-7}$ | $3.31 \times 10^{-7}$  |
| 6              | $1.57 \times 10^3$    | $3.09 \times 10^2$     | $1.17 \times 10^{-5}$ | $5.16 \times 10^{-6}$  |
| 7              | $1.44 \times 10^3$    | $3.14 \times 10^2$     | $8.25 \times 10^{-5}$ | $2.75 \times 10^{-5}$  |
| 7 days(162 h)  |                       |                        |                       |                        |
| Element Number | R / $\Omega$          | R Std. Dev. / $\Omega$ | C /F                  | C Std. Dev. /F         |
| 1              | $2.73 \times 10^3$    | $3.47 \times 10^2$     | $1.74 \times 10^{-9}$ | $3.67 \times 10^{-10}$ |
| 2              | $3.40 \times 10^3$    | $2.25 \times 10^2$     | $7.36 \times 10^{-9}$ | $1.23 \times 10^{-9}$  |
| 3              | $1.80 \times 10^3$    | $2.64 \times 10^2$     | $5.48 \times 10^{-8}$ | $1.49 \times 10^{-8}$  |
| 4              | $8.74 \times 10^2$    | $1.62 \times 10^2$     | $5.71 \times 10^{-7}$ | $1.92 \times 10^{-7}$  |
| 5              | $2.83 \times 10^2$    | $9.49 \times 10^1$     | $1.28 \times 10^{-5}$ | $6.34 \times 10^{-6}$  |

**Table S4.** Resistance and capacitance values for each R/C element and their standard deviations obtained by equivalent circuit analysis using the Voigt measurement model for the impedance characteristics of each measurement date in C6 specimen.

| 0 day          |                       |                        |                        |                        |
|----------------|-----------------------|------------------------|------------------------|------------------------|
| Element Number | R / $\Omega$          | R Std. Dev. / $\Omega$ | C /F                   | C Std. Dev. /F         |
| 1              | $6.99 \times 10^4$    | $1.41 \times 10^4$     | $4.23 \times 10^{-9}$  | $1.16 \times 10^{-9}$  |
| 2              | $5.03 \times 10^6$    | $1.27 \times 10^6$     | $4.73 \times 10^{-9}$  | $1.56 \times 10^{-9}$  |
| 3              | $1.26 \times 10^8$    | $4.15 \times 10^7$     | $4.64 \times 10^{-9}$  | $1.94 \times 10^{-9}$  |
| 4              | $2.84 \times 10^9$    | $8.65 \times 10^8$     | $2.56 \times 10^{-9}$  | $9.61 \times 10^{-10}$ |
| 5              | $2.34 \times 10^{11}$ | $5.98 \times 10^{10}$  | $6.88 \times 10^{-10}$ | $2.64 \times 10^{-10}$ |
| 1 day(22 h)    |                       |                        |                        |                        |
| Element Number | R / $\Omega$          | R Std. Dev. / $\Omega$ | C /F                   | C Std. Dev. /F         |
| 1              | $4.91 \times 10^3$    | $1.11 \times 10^3$     | $5.05 \times 10^{-9}$  | $1.49 \times 10^{-9}$  |
| 2              | $4.97 \times 10^4$    | $9.97 \times 10^3$     | $4.19 \times 10^{-9}$  | $1.09 \times 10^{-9}$  |
| 3              | $2.97 \times 10^5$    | $1.12 \times 10^5$     | $5.05 \times 10^{-9}$  | $2.34 \times 10^{-9}$  |
| 4              | $1.70 \times 10^6$    | $4.18 \times 10^5$     | $4.29 \times 10^{-9}$  | $1.47 \times 10^{-9}$  |
| 5              | $8.16 \times 10^6$    | $8.68 \times 10^5$     | $4.15 \times 10^{-9}$  | $7.62 \times 10^{-10}$ |
| 6              | $4.15 \times 10^7$    | $2.77 \times 10^6$     | $4.68 \times 10^{-9}$  | $5.02 \times 10^{-10}$ |
| 7              | $2.27 \times 10^8$    | $1.76 \times 10^7$     | $5.30 \times 10^{-9}$  | $5.31 \times 10^{-10}$ |
| 8              | $7.32 \times 10^7$    | $1.89 \times 10^7$     | $5.13 \times 10^{-8}$  | $1.64 \times 10^{-8}$  |
| 4 days(90 h)   |                       |                        |                        |                        |
| Element Number | R / $\Omega$          | R Std. Dev. / $\Omega$ | C /F                   | C Std. Dev. /F         |
| 1              | $5.45 \times 10^3$    | $8.11 \times 10^2$     | $3.22 \times 10^{-9}$  | $6.43 \times 10^{-10}$ |

| 2              | $3.58 \times 10^4$ | $5.86 \times 10^3$     | $3.57 \times 10^{-9}$ | $7.57 \times 10^{-10}$ |
|----------------|--------------------|------------------------|-----------------------|------------------------|
| 3              | $1.11 \times 10^5$ | $2.36 \times 10^4$     | $6.01 \times 10^{-9}$ | $1.79 \times 10^{-9}$  |
| 4              | $4.09 \times 10^5$ | $6.32 \times 10^4$     | $8.30 \times 10^{-9}$ | $2.06 \times 10^{-9}$  |
| 5              | $1.60 \times 10^6$ | $1.45 \times 10^5$     | $1.12 \times 10^{-8}$ | $1.77 \times 10^{-9}$  |
| 6              | $1.05 \times 10^7$ | $3.90 \times 10^5$     | $1.03 \times 10^{-8}$ | $6.54 \times 10^{-10}$ |
| 7              | $6.55 \times 10^6$ | $4.61 \times 10^5$     | $8.04 \times 10^{-8}$ | $8.11 \times 10^{-9}$  |
| 7 days(162 h)  |                    |                        |                       |                        |
| Element Number | R / $\Omega$       | R Std. Dev. / $\Omega$ | C /F                  | C Std. Dev. /F         |
| 1              | $3.25 \times 10^3$ | $7.39 \times 10^2$     | $3.16 \times 10^{-9}$ | $9.82 \times 10^{-10}$ |
| 2              | $1.28 \times 10^4$ | $2.48 \times 10^3$     | $4.30 \times 10^{-9}$ | $1.17 \times 10^{-9}$  |
| 3              | $4.71 \times 10^4$ | $4.02 \times 10^3$     | $4.82 \times 10^{-9}$ | $7.53 \times 10^{-10}$ |
| 4              | $1.34 \times 10^5$ | $1.21 \times 10^4$     | $8.40 \times 10^{-9}$ | $1.21 \times 10^{-9}$  |
| 5              | $2.55 \times 10^5$ | $1.77 \times 10^4$     | $1.99 \times 10^{-8}$ | $2.71 \times 10^{-9}$  |
| 6              | $3.69 \times 10^5$ | $2.70 \times 10^4$     | $6.40 \times 10^{-8}$ | $9.42 \times 10^{-9}$  |
| 7              | $2.45 \times 10^5$ | $3.26 \times 10^4$     | $3.96 \times 10^{-7}$ | $8.26 \times 10^{-8}$  |
| 8              | $7.28 \times 10^4$ | $1.19 \times 10^4$     | $1.14 \times 10^{-5}$ | $3.19 \times 10^{-6}$  |
| 11 days(258 h) |                    |                        |                       |                        |
| Element Number | R / $\Omega$       | R Std. Dev. / $\Omega$ | C /F                  | C Std. Dev. /F         |
| 1              | $2.67 \times 10^3$ | $4.03 \times 10^2$     | $3.15 \times 10^{-9}$ | $6.65 \times 10^{-10}$ |
| 2              | $9.16 \times 10^3$ | $1.69 \times 10^3$     | $4.89 \times 10^{-9}$ | $1.17 \times 10^{-9}$  |
| 3              | $2.52 \times 10^4$ | $6.80 \times 10^3$     | $6.65 \times 10^{-9}$ | $2.30 \times 10^{-9}$  |
| 4              | $4.17 \times 10^4$ | $1.08 \times 10^4$     | $1.25 \times 10^{-8}$ | $5.32 \times 10^{-9}$  |
| 5              | $1.01 \times 10^5$ | $1.13 \times 10^4$     | $1.65 \times 10^{-8}$ | $4.05 \times 10^{-9}$  |
| 6              | $1.49 \times 10^5$ | $1.21 \times 10^4$     | $3.89 \times 10^{-8}$ | $6.99 \times 10^{-9}$  |
| 7              | $1.70 \times 10^5$ | $1.45 \times 10^4$     | $1.22 \times 10^{-7}$ | $1.58 \times 10^{-8}$  |
| 8              | $5.65 \times 10^4$ | $6.12 \times 10^3$     | $2.21 \times 10^{-6}$ | $3.48 \times 10^{-7}$  |
| 14 days(330 h) |                    |                        |                       |                        |
| Element Number | R / $\Omega$       | R Std. Dev. / $\Omega$ | C /F                  | C Std. Dev. /F         |
| 1              | $2.81 \times 10^3$ | $3.35 \times 10^2$     | $2.68 \times 10^{-9}$ | $4.62 \times 10^{-10}$ |
| 2              | $8.89 \times 10^3$ | $7.44 \times 10^2$     | $4.43 \times 10^{-9}$ | $5.73 \times 10^{-10}$ |
| 3              | $2.54 \times 10^4$ | $1.52 \times 10^3$     | $6.29 \times 10^{-9}$ | $6.32 \times 10^{-10}$ |
| 4              | $6.34 \times 10^4$ | $3.72 \times 10^3$     | $1.06 \times 10^{-8}$ | $1.01 \times 10^{-9}$  |
| 5              | $1.14 \times 10^5$ | $7.79 \times 10^3$     | $2.43 \times 10^{-8}$ | $2.78 \times 10^{-9}$  |
| 6              | $1.38 \times 10^5$ | $7.79 \times 10^3$     | $7.29 \times 10^{-8}$ | $9.15 \times 10^{-9}$  |
| 7              | $1.10 \times 10^5$ | $1.02 \times 10^4$     | $3.33 \times 10^{-7}$ | $4.52 \times 10^{-8}$  |
| 8              | $1.82 \times 10^4$ | $3.43 \times 10^3$     | $1.27 \times 10^{-5}$ | $3.45 \times 10^{-6}$  |
| 19 days(449 h) |                    |                        |                       |                        |
| Element Number | R / $\Omega$       | R Std. Dev. / $\Omega$ | C /F                  | C Std. Dev. /F         |
| 1              | $3.16 \times 10^3$ | $3.25 \times 10^2$     | $2.04 \times 10^{-9}$ | $3.44 \times 10^{-10}$ |
| 2              | $9.71 \times 10^3$ | $7.06 \times 10^2$     | $4.02 \times 10^{-9}$ | $4.65 \times 10^{-10}$ |
| 3              | $2.77 \times 10^4$ | $1.38 \times 10^3$     | $6.08 \times 10^{-9}$ | $5.29 \times 10^{-10}$ |
| 4              | $6.85 \times 10^4$ | $3.24 \times 10^3$     | $1.12 \times 10^{-8}$ | $8.94 \times 10^{-10}$ |
| 5              | $1.17 \times 10^5$ | $4.20 \times 10^3$     | $2.85 \times 10^{-8}$ | $2.14 \times 10^{-9}$  |
| 6              | $1.28 \times 10^5$ | $4.42 \times 10^3$     | $1.14 \times 10^{-7}$ | $8.38 \times 10^{-9}$  |
| 7              | $4.31 \times 10^4$ | $4.47 \times 10^3$     | $1.67 \times 10^{-6}$ | $2.31 \times 10^{-7}$  |



**Table S5.** Resistance and capacitance values for each R/C element and their standard deviations obtained by equivalent circuit analysis using the Voigt measurement model for the impedance characteristics of each measurement date in C7 specimen.

| 0 day          |                       |                        |                        |                        |
|----------------|-----------------------|------------------------|------------------------|------------------------|
| Element Number | R / $\Omega$          | R Std. Dev. / $\Omega$ | C /F                   | C Std. Dev. /F         |
| 1              | $4.93 \times 10^4$    | $8.81 \times 10^3$     | $3.99 \times 10^{-9}$  | $9.25 \times 10^{-10}$ |
| 2              | $9.22 \times 10^5$    | $2.67 \times 10^5$     | $5.38 \times 10^{-9}$  | $2.02 \times 10^{-9}$  |
| 3              | $1.24 \times 10^7$    | $4.53 \times 10^6$     | $5.63 \times 10^{-9}$  | $2.64 \times 10^{-9}$  |
| 4              | $1.67 \times 10^8$    | $4.28 \times 10^7$     | $4.07 \times 10^{-9}$  | $1.40 \times 10^{-9}$  |
| 5              | $2.51 \times 10^9$    | $5.05 \times 10^8$     | $2.59 \times 10^{-9}$  | $6.74 \times 10^{-10}$ |
| 6              | $1.83 \times 10^{11}$ | $2.25 \times 10^{10}$  | $6.71 \times 10^{-10}$ | $1.26 \times 10^{-10}$ |
| 5 days(121 h)  |                       |                        |                        |                        |
| Element Number | R / $\Omega$          | R Std. Dev. / $\Omega$ | C /F                   | C Std. Dev. /F         |
| 1              | $1.81 \times 10^3$    | $3.71 \times 10^2$     | $4.25 \times 10^{-9}$  | $1.20 \times 10^{-9}$  |
| 2              | $2.30 \times 10^3$    | $2.72 \times 10^2$     | $1.40 \times 10^{-8}$  | $3.22 \times 10^{-9}$  |
| 3              | $1.89 \times 10^4$    | $4.69 \times 10^3$     | $1.89 \times 10^{-8}$  | $5.31 \times 10^{-9}$  |
| 4              | $1.31 \times 10^5$    | $1.95 \times 10^4$     | $1.06 \times 10^{-8}$  | $2.03 \times 10^{-9}$  |
| 5              | $1.52 \times 10^5$    | $1.59 \times 10^4$     | $2.95 \times 10^{-8}$  | $6.82 \times 10^{-9}$  |
| 6              | $1.89 \times 10^5$    | $1.81 \times 10^4$     | $8.64 \times 10^{-8}$  | $1.53 \times 10^{-8}$  |
| 7              | $1.31 \times 10^5$    | $1.13 \times 10^4$     | $6.14 \times 10^{-7}$  | $1.01 \times 10^{-7}$  |
| 8              | $7.19 \times 10^4$    | $6.84 \times 10^3$     | $8.62 \times 10^{-6}$  | $2.17 \times 10^{-6}$  |
| 6 days(140 h)  |                       |                        |                        |                        |
| Element Number | R / $\Omega$          | R Std. Dev. / $\Omega$ | C /F                   | C Std. Dev. /F         |
| 1              | $2.23 \times 10^3$    | $2.78 \times 10^2$     | $4.94 \times 10^{-9}$  | $9.83 \times 10^{-10}$ |
| 2              | $1.06 \times 10^4$    | $1.56 \times 10^3$     | $8.70 \times 10^{-9}$  | $1.77 \times 10^{-9}$  |
| 3              | $5.82 \times 10^4$    | $8.67 \times 10^3$     | $1.01 \times 10^{-8}$  | $2.04 \times 10^{-9}$  |
| 4              | $2.81 \times 10^5$    | $2.35 \times 10^4$     | $1.12 \times 10^{-8}$  | $1.52 \times 10^{-9}$  |
| 5              | $7.13 \times 10^5$    | $1.48 \times 10^5$     | $2.65 \times 10^{-8}$  | $7.12 \times 10^{-9}$  |
| 6              | $2.14 \times 10^6$    | $1.96 \times 10^5$     | $3.43 \times 10^{-8}$  | $5.95 \times 10^{-9}$  |
| 7              | $1.19 \times 10^6$    | $2.45 \times 10^5$     | $2.27 \times 10^{-7}$  | $6.88 \times 10^{-8}$  |
| 8              | $4.03 \times 10^5$    | $7.62 \times 10^4$     | $5.45 \times 10^{-6}$  | $1.77 \times 10^{-6}$  |
| 9 days(211 h)  |                       |                        |                        |                        |
| Element Number | R / $\Omega$          | R Std. Dev. / $\Omega$ | C /F                   | C Std. Dev. /F         |
| 1              | $1.73 \times 10^3$    | $1.39 \times 10^2$     | $6.19 \times 10^{-9}$  | $8.20 \times 10^{-10}$ |
| 2              | $8.91 \times 10^3$    | $1.05 \times 10^3$     | $1.11 \times 10^{-8}$  | $1.71 \times 10^{-9}$  |
| 3              | $4.87 \times 10^4$    | $4.51 \times 10^3$     | $1.14 \times 10^{-8}$  | $1.48 \times 10^{-9}$  |
| 4              | $1.83 \times 10^5$    | $1.12 \times 10^4$     | $1.56 \times 10^{-8}$  | $1.57 \times 10^{-9}$  |
| 5              | $4.32 \times 10^5$    | $1.94 \times 10^4$     | $3.33 \times 10^{-8}$  | $2.84 \times 10^{-9}$  |
| 6              | $4.88 \times 10^5$    | $2.14 \times 10^4$     | $1.45 \times 10^{-7}$  | $1.42 \times 10^{-8}$  |
| 7              | $2.53 \times 10^5$    | $2.22 \times 10^4$     | $1.61 \times 10^{-6}$  | $2.40 \times 10^{-7}$  |
| 8              | $1.21 \times 10^5$    | $1.49 \times 10^4$     | $6.65 \times 10^{-5}$  | $1.75 \times 10^{-5}$  |
| 12 days(284 h) |                       |                        |                        |                        |
| Element Number | R / $\Omega$          | R Std. Dev. / $\Omega$ | C /F                   | C Std. Dev. /F         |
| 1              | $2.19 \times 10^3$    | $3.99 \times 10^2$     | $5.35 \times 10^{-9}$  | $1.54 \times 10^{-9}$  |
| 2              | $1.22 \times 10^4$    | $2.92 \times 10^3$     | $8.57 \times 10^{-9}$  | $2.71 \times 10^{-9}$  |
| 3              | $7.69 \times 10^4$    | $1.34 \times 10^4$     | $7.83 \times 10^{-9}$  | $1.90 \times 10^{-9}$  |
| 4              | $2.66 \times 10^5$    | $4.42 \times 10^4$     | $1.20 \times 10^{-8}$  | $2.97 \times 10^{-9}$  |
| 5              | $4.59 \times 10^5$    | $6.99 \times 10^4$     | $3.07 \times 10^{-8}$  | $8.68 \times 10^{-9}$  |
| 6              | $4.19 \times 10^5$    | $7.17 \times 10^4$     | $1.39 \times 10^{-7}$  | $4.81 \times 10^{-8}$  |

| 7              | $1.76 \times 10^5$ | $6.14 \times 10^4$     | $1.75 \times 10^{-6}$ | $8.49 \times 10^{-7}$  |
|----------------|--------------------|------------------------|-----------------------|------------------------|
| 17 days(404 h) |                    |                        |                       |                        |
| Element Number | R / $\Omega$       | R Std. Dev. / $\Omega$ | C /F                  | C Std. Dev. /F         |
| 1              | $3.07 \times 10^3$ | $2.75 \times 10^2$     | $5.47 \times 10^{-9}$ | $7.90 \times 10^{-10}$ |
| 2              | $3.79 \times 10^4$ | $3.42 \times 10^3$     | $6.33 \times 10^{-9}$ | $7.45 \times 10^{-10}$ |
| 3              | $1.56 \times 10^5$ | $5.82 \times 10^3$     | $9.73 \times 10^{-9}$ | $7.25 \times 10^{-10}$ |
| 4              | $1.05 \times 10^5$ | $6.42 \times 10^3$     | $1.10 \times 10^{-7}$ | $1.36 \times 10^{-8}$  |
| 19 days(452 h) |                    |                        |                       |                        |
| Element Number | R / $\Omega$       | R Std. Dev. / $\Omega$ | C /F                  | C Std. Dev. /F         |
| 1              | $8.77 \times 10^2$ | $2.27 \times 10^2$     | $5.02 \times 10^{-9}$ | $2.69 \times 10^{-9}$  |
| 2              | $2.16 \times 10^3$ | $5.25 \times 10^2$     | $1.51 \times 10^{-8}$ | $5.76 \times 10^{-9}$  |
| 3              | $1.09 \times 10^4$ | $2.79 \times 10^3$     | $1.39 \times 10^{-8}$ | $4.61 \times 10^{-9}$  |
| 4              | $5.61 \times 10^4$ | $4.68 \times 10^3$     | $9.57 \times 10^{-9}$ | $1.35 \times 10^{-9}$  |
| 5              | $1.19 \times 10^5$ | $4.60 \times 10^3$     | $1.63 \times 10^{-8}$ | $1.34 \times 10^{-9}$  |
| 6              | $6.33 \times 10^4$ | $4.02 \times 10^3$     | $1.54 \times 10^{-7}$ | $2.20 \times 10^{-8}$  |
| 7              | $3.50 \times 10^4$ | $3.93 \times 10^3$     | $1.73 \times 10^{-6}$ | $6.25 \times 10^{-7}$  |
| 23 days(548 h) |                    |                        |                       |                        |
| Element Number | R / $\Omega$       | R Std. Dev. / $\Omega$ | C /F                  | C Std. Dev. /F         |
| 1              | $1.49 \times 10^3$ | $2.33 \times 10^2$     | $4.66 \times 10^{-9}$ | $1.27 \times 10^{-9}$  |
| 2              | $4.60 \times 10^3$ | $1.06 \times 10^3$     | $1.10 \times 10^{-8}$ | $3.43 \times 10^{-9}$  |
| 3              | $3.24 \times 10^4$ | $5.05 \times 10^3$     | $7.24 \times 10^{-9}$ | $1.47 \times 10^{-9}$  |
| 4              | $1.02 \times 10^5$ | $4.83 \times 10^3$     | $8.13 \times 10^{-9}$ | $8.34 \times 10^{-10}$ |
| 5              | $7.57 \times 10^4$ | $5.79 \times 10^3$     | $4.48 \times 10^{-8}$ | $5.93 \times 10^{-9}$  |
| 6              | $3.55 \times 10^4$ | $2.82 \times 10^3$     | $6.37 \times 10^{-7}$ | $9.86 \times 10^{-8}$  |
